# Supplementary material for: Spatial, temporal, and meteorological impact of the 26 February 2023 dust storm: increase in particulate matter concentrations across New Mexico and West Texas
Source: Copernicus journal article supplement (doi:10.5194/acp-24-13733-2024), 2024-12-12
Supplement: Supplementary file 3 [file acp-24-13733-2024-supplement.zip]

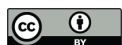

## *Supplement of*

# **Spatial, temporal, and meteorological impact of the 26 February 2023 dust storm: increase in particulate matter concentrations across New Mexico and West Texas**

**Mary C. Robinson et al.**

*Correspondence to:* Karin Ardon-Dryer ([karin.ardon-dryer@ttu.edu](mailto:karin.ardon-dryer@ttu.edu))

- [acp-24-13733-2024-supplement-title-page.pdf](#)
- Supplement
  - [Fig S1.pdf](#)
  - [Fig S2.pdf](#)
  - [Supplement-new.docx](#)
  - [Supplement-new.xlsx](#)

The copyright of individual parts of the supplement might differ from the article licence.
