# Supplementary figures and images for: Spatial, temporal, and meteorological impact of the 26 February 2023 dust storm: increase in particulate matter concentrations across New Mexico and West Texas
Source: Copernicus journal article supplement (doi:10.5194/acp-24-13733-2024), 2024-12-12

Through 11:59 PM CST

February 26, 2023

**WEST TEXAS  
MESONET**

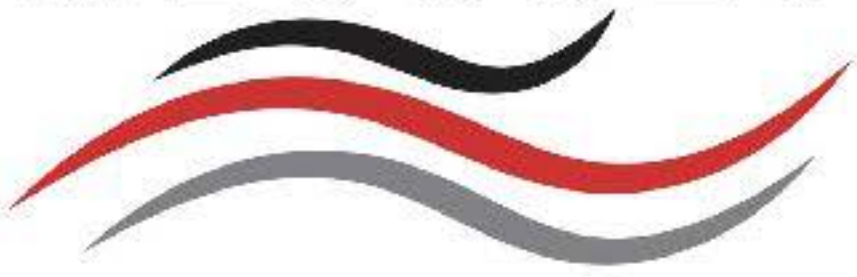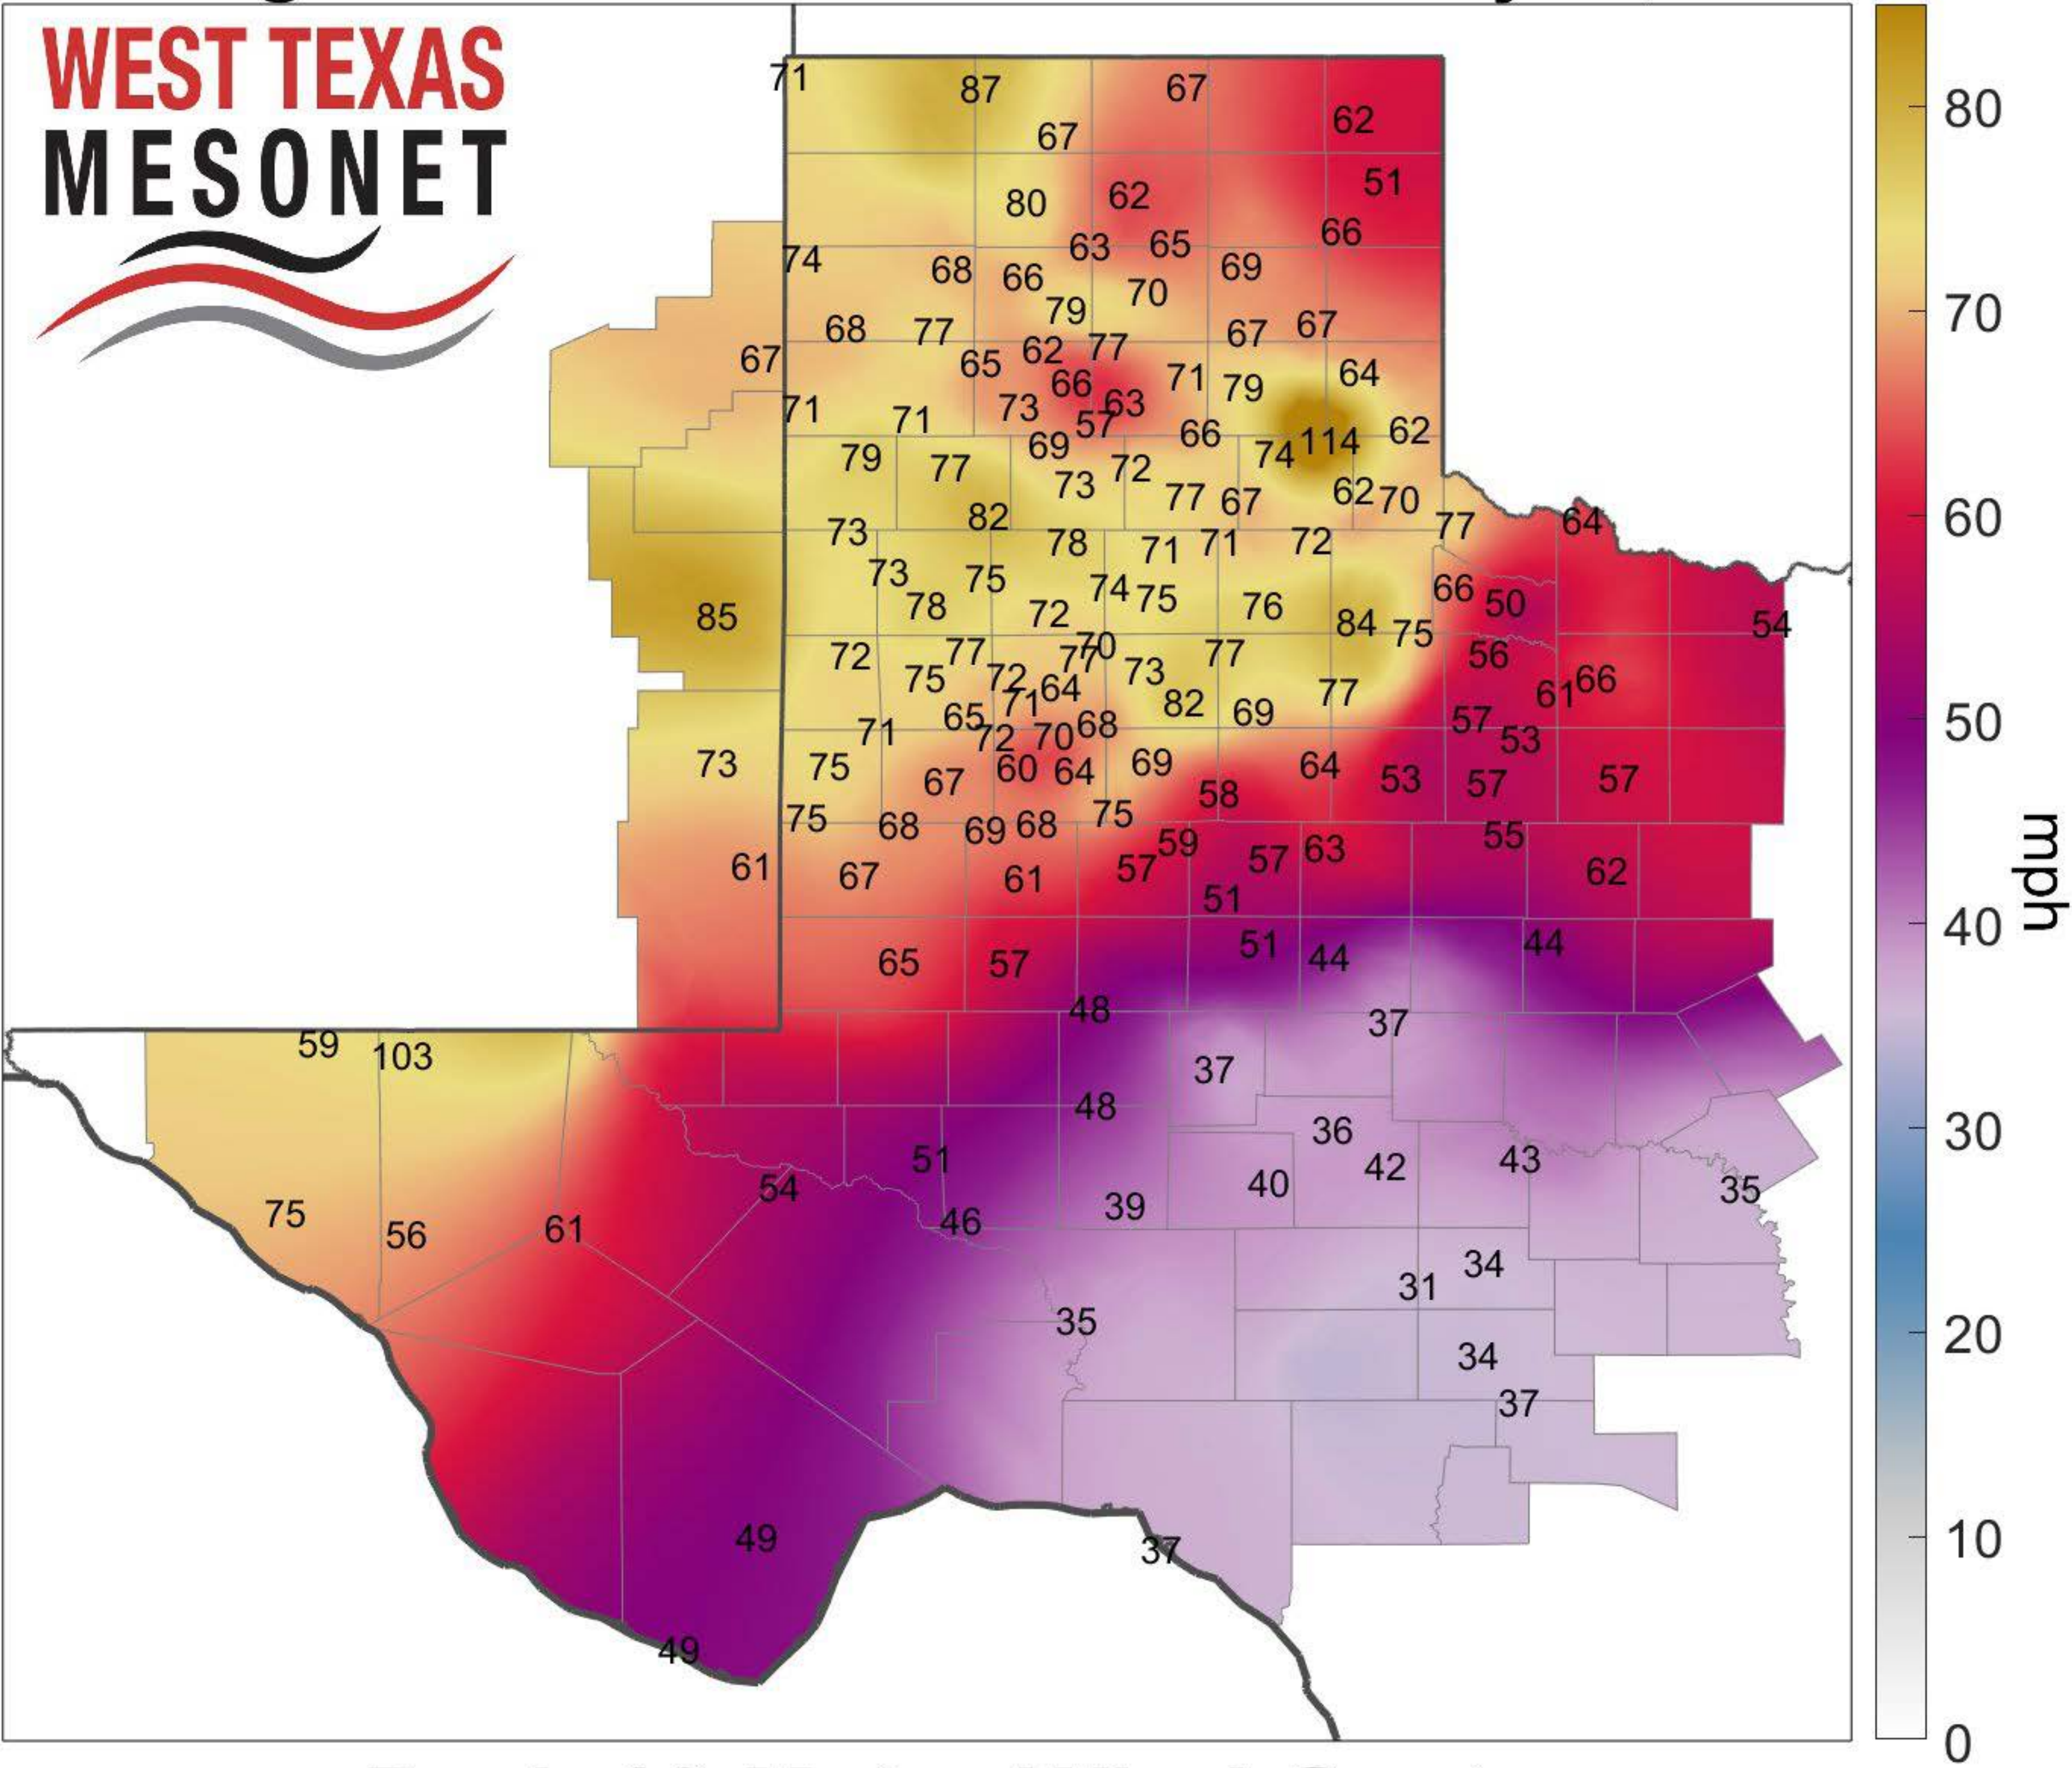

**Peak 10 Meter Wind Gust**

Supplement: Supplementary file 1 [file acp-24-13733-2024-supplement.zip]

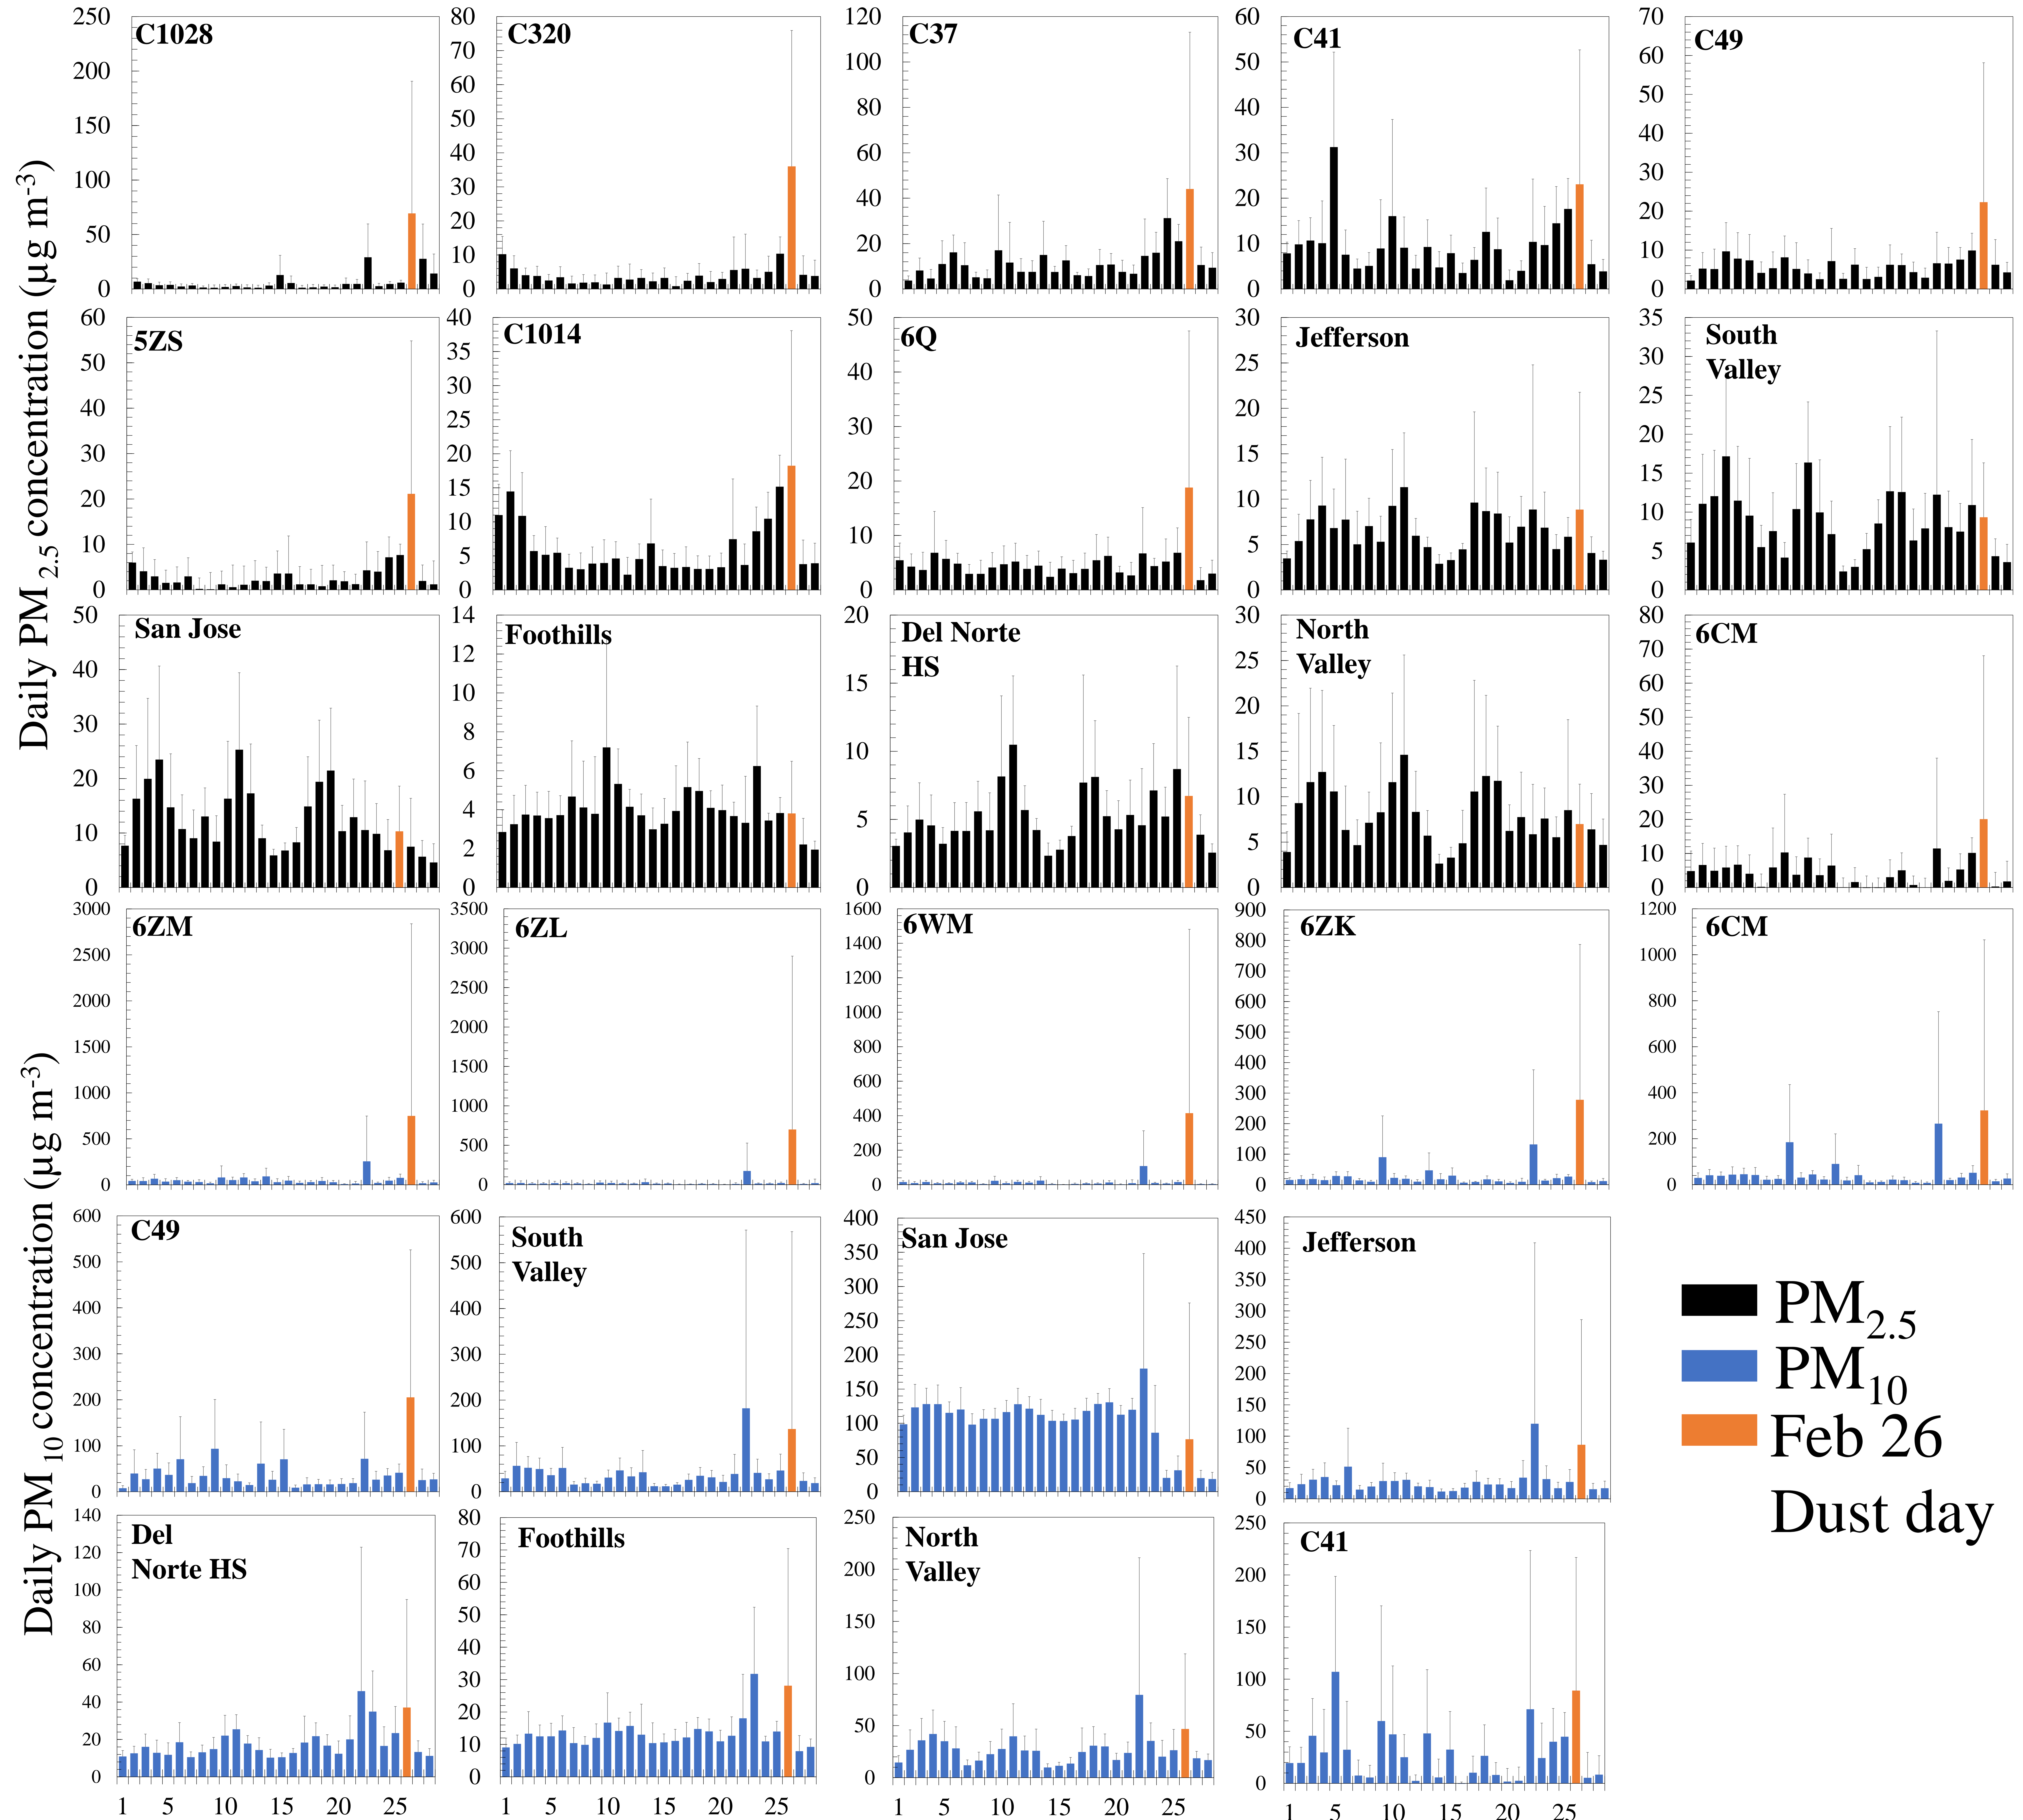

Day February 2023

Supplement: Supplementary file 2 [file acp-24-13733-2024-supplement.zip]
